1 **Title: Functional buffering via cell-specific gene expression promotes tissue homeostasis**  
2 **and cancer robustness**

3

4 Hao-Kuen Lin<sup>a,b,1</sup>, Jen-Hao Cheng<sup>a,c,1</sup>, Chia-Chou Wu<sup>a,1</sup>, Feng-Shu Hsieh<sup>a</sup>, Carolyn Dunlap<sup>a</sup>,  
5 and Sheng-hong Chen<sup>a,c\*</sup>

6

7 <sup>a</sup> Lab for Cell Dynamics, Institute of Molecular Biology, Academia Sinica, Taipei 115,  
8 Taiwan

9 <sup>b</sup> College of Medicine, National Taiwan University, Taipei 106, Taiwan

10 <sup>c</sup> Genome and Systems Biology Degree Program, Academia Sinica and National Taiwan  
11 University, Taipei, Taiwan

12

13 <sup>1</sup> equal contribution

14 \* Correspondence: [shengchen@gate.sinica.edu.tw](mailto:shengchen@gate.sinica.edu.tw)

15 **Summary blurb**

16 We unveil a genome-wide functional buffering mechanism, termed Cell-specific Expression  
17 Buffering (CEBU), whereby gene expression contributes to functional buffering in specific  
18 cell types and tissues. We link CEBU to genetic interactions, tissue homeostasis and cancer  
19 robustness.

20 **Abstract**

21 Functional buffering that ensures biological robustness is critical for maintaining tissue  
22 homeostasis, organismal survival, and evolution of novelty. However, the mechanism  
23 underlying functional buffering, particularly in multicellular organisms, remains largely  
24 elusive. Here, we developed an inference index (C-score) for Cell-specific Expression-  
25 BUffering (CEBU), whereby functional buffering is mediated via expression of buffering  
26 genes in specific cells and tissues in humans. By computing C-scores across 684 human cell  
27 lines using genome-wide CRISPR screens and transcriptomic RNA-seq, we report that C-  
28 score-identified putative buffering gene pairs are enriched for members of the same  
29 duplicated gene family, pathway, and protein complex. Furthermore, CEBU is especially  
30 prevalent in tissues of low regenerative capacity (e.g., bone and neuronal tissues) and is  
31 weakest in highly regenerative blood cells, linking functional buffering to tissue regeneration.  
32 Clinically, the buffering capacity enabled by CEBU can help predict patient survival for  
33 multiple cancers. Our results reveal CEBU as a buffering mechanism contributing to tissue  
34 homeostasis and cancer robustness in humans.

35

36 **Running title:** Expression buffering for cancer robustness

37 **Keywords:** functional buffering, expression buffering, buffering capacity, genetic interaction,  
38 homeostasis, cancer robustness

39

## 40 **Introduction**

41 Robustness in biological systems is critical for organisms to carry out vital functions in the  
42 face of environmental challenges <sup>1,2</sup>. A fundamental requirement for achieving biological  
43 robustness is functional buffering, whereby the biological functions performed by one gene  
44 can also be attained via other buffering genes. Although functional buffering has long been  
45 regarded as a critical function contributing to biological robustness, the mechanisms  
46 underlying functional buffering remain largely unclear <sup>3</sup>. Based on transcriptional regulation  
47 of buffering genes, functional buffering can be categorized as either needs-based buffering or  
48 intrinsic buffering. Needs-based buffering involves transcriptional activation of buffering  
49 genes only when the function of a buffered gene is compromised. To accomplish needs-based  
50 buffering, a control system must exist that senses compromised function and then activates  
51 expression of buffering genes. Needs-based buffering is often observed as genetic  
52 compensation in various biological systems including fungi, animals and plants <sup>3-6</sup>. One  
53 classical needs-based buffering mechanism is genetic compensation among duplicated genes,  
54 whereby expression of a paralogous gene is upregulated when the function of the active  
55 duplicated gene is compromised <sup>7</sup>. Genetic analyses of duplicated genes in *Saccharomyces*  
56 *cerevisiae* have revealed upregulation of gene expression in ~ 10% of paralogs when cell  
57 growth is compromised due to deletions of their duplicated genes <sup>6,8,9</sup>. Apart from duplicated  
58 genes, non-orthologous/analogous genes can also be activated for needs-based buffering <sup>10</sup>.  
59 For instance, inactivation of one growth signaling pathway can lead to activation of others for  
60 the coordination of cell growth and survival <sup>3,7</sup>. Such needs-based buffering genes have been  
61 documented as enabling unicellular/multicellular organisms to cope with environmental  
62 stresses <sup>3,9</sup>.

63

64 Recent genome-wide studies of duplicated genes in human cells have revealed another class  
65 of buffering mechanism whereby expression of buffering genes is not responsive to impaired  
66 function but is constitutively expressed, hereafter termed “intrinsic buffering”<sup>11-13</sup>. In some  
67 duplicated gene families, the strength of paralogous gene expression determines the  
68 essentiality of their corresponding duplicated genes in human cell lines, i.e., the higher the  
69 expression of paralogous genes in a particular cell line, the less essential are their duplicated  
70 genes<sup>11-13</sup>. This observation indicates that paralogs may buffer and contribute to the function  
71 of their duplicated genes in specific cells through their constitutive gene expression. In  
72 addition to duplicated gene families, gene essentiality can depend on inherent variability in  
73 the expression levels of other genes in the same pathway, suggesting that functionally  
74 analogous genes in the same pathway can also buffer each other<sup>14</sup>. Despite these  
75 observations, it remains unclear what mechanism may give rise to this context-dependent  
76 constitutive expression of buffering genes and how such intrinsic buffering may function in  
77 multicellular organisms.

78

79 In this study, we directly investigated if cell- and tissue-specific gene expression can act as an  
80 intrinsic buffering mechanism (which we have termed “Cell-specific Expression-BUffering”  
81 or CEBU, **Fig. 1A**) to buffer functionally related genes in the genome, thereby strengthening  
82 cellular plasticity for cell- and tissue-specific tasks. To estimate buffering capability, we  
83 developed an inference index, the C-score, to identify putative gene pairs displaying CEBU.  
84 This index calculates the adjusted correlation between expression of a buffering gene and the  
85 essentiality of the buffered gene (**Fig. 1B**), utilizing transcriptomics data<sup>15</sup> and genome-wide  
86 dependency data from the DepMap project<sup>15,16</sup> across 684 human cell lines. Our results  
87 suggest that CEBU-mediated intrinsic buffering plays a critical role in cell-specific survival,  
88 tissue homeostasis, and cancer robustness.

89

## 90 **Results**

### 91 **Development of the C-score to infer cell-specific expression buffering (CEBU)**

92 In seeking an index to infer intrinsic buffering operated via constitutive gene expression, we  
93 postulated a buffering relationship whereby the essentiality of a buffered gene (G1) increases  
94 when expression of its buffering gene (G2) decreases across different human cell lines (**Fig.**  
95 **1**). Given that G2 expression differs among cell lines, the strength of buffering capacity  
96 varies across cell lines, thereby conferring on G1 cell-specific essentiality. This cell-specific  
97 expression buffering mechanism, here named CEBU, is the basis for our development of the  
98 C-score. The C-score of a gene pair is derived from the correlation between the essentiality of  
99 a buffered gene (G1) and expression of its buffering gene (G2) (see C-score plot, **Fig. 1B**),  
100 and is formulated as:

$$101 \quad \text{C-score} = \rho_{G1,G2} \left( 1 + b \frac{\text{slope}_{min}}{\text{slope}_{G1,G2}} \right)$$

102 where  $\rho$  denotes the Pearson correlation coefficient between essentiality of G1 and  
103 expression of G2. Their regression slope ( $\text{slope}_{G1,G2}$ ) is normalized to  $\text{slope}_{min}$ , which denotes  
104 the minimum slope of all considered gene pairs in the human genome (see **Methods**). The  
105 normalized slope can be weighted by cell- or tissue type-specific  $b$ . In our current analysis,  $b$   
106 is set as 1 for a pan-cell- and pan-cancer-type analysis. Gene essentiality is represented by  
107 dependency scores (D.S.) from the DepMap project<sup>16</sup>, where the effect of each gene on cell  
108 proliferation was quantified after its knockout using the CRISPR/Cas-9 approach.  
109 Specifically, a more negative D.S. reflects slower cell proliferation when the gene is knocked  
110 out, thus reflecting stronger essentiality. Expression data was obtained through RNA-seq<sup>15</sup>.  
111 We anticipated that the higher the C-score of a gene pair, the more likely G2 would buffer G1  
112 based on our proposed CEBU mechanism.

113

114 We conducted a genome-wide analysis to calculate C-scores for all gene pairs across 684  
115 human cell lines. The calculated C-scores were compared to a bootstrapped null distribution  
116 generated by random shuffling of G2 expression among cell lines (**Fig. S1A**). The  
117 bootstrapped null distribution can be modeled as a normal distribution (**Fig. S1B**). For our  
118 analysis, we considered gene pairs to have a high C-score with a strong likelihood of intrinsic  
119 buffering when their C-scores were  $> 0.25$  (0.058% of gene pairs in the human genome,  
120 significant with a  $q$ -value  $< 2.2e-16$  after multiple testing correction, **Fig. S1A**). Based on our  
121 C-score definition, a high C-score should be indicative of marked variability in cell-specific  
122 essentiality and expression. Indeed, we observed higher variability in both G1 dependency  
123 and G2 expression for high C-score gene pairs (**Fig. S2A**). Nevertheless, high variation alone  
124 is insufficient to grant a high C-score. A high C-score requires consistent pairing between G1  
125 and G2 across cell lines and, as anticipated, disrupting the pairing between G1 dependency  
126 and G2 expression by shuffling G2 expression amongst cell lines (without changing  
127 variability) abolished the C-score relationship (compare the right panel of **Fig. S2B** to the left  
128 one). Moreover, both mean G1 dependency and mean G2 expression in high C-score gene  
129 pairs were lower than those parameters in randomly selected gene pairs (**Fig. S2C**), implying  
130 that G1s and G2s in high C-score gene pairs tend to be more essential and less expressed,  
131 respectively.

132

### 133 **Characterization of C-score-inferred CEBU gene pairs**

134 Since several duplicated gene pairs have been implicated as displaying functional buffering  
135 via gene expression<sup>11-13</sup>, we characterized the duplicated genes among C-score-identified  
136 gene pairs. We found that duplicated gene pairs are enriched among gene pairs with C-scores  
137  $> 0.255$  ( $p$ -value = 0.05 using a hypergeometric test), suggesting that CEBU is a prevalent  
138 buffering mechanism among duplicated genes (**Fig. 2A**). Interestingly, the majority of high

139 C-score gene pairs are non-duplicated (> 90%, **Fig. S3A**). In these cases, G2s may be  
140 functional analogs of the respective G1s, acting as surrogate genes. Accordingly, we  
141 examined if the high C-score gene pairs are more likely to participate in the same function or  
142 biological pathway or physically interact. To do so, we calculated the enrichment of curated  
143 gene sets in terms of Gene Ontology (GO)<sup>17</sup> and Kyoto Encyclopedia of Genes and Genomes  
144 (KEGG)<sup>18</sup> from the Molecular Signatures Database<sup>19</sup> (**Fig. 2B**). Gene pairs with high C-  
145 scores consistently exhibited greater functional enrichment. Likewise, we observed a  
146 monotonic increase in the enrichment of protein-protein interactions (PPI) [using the  
147 STRING<sup>20</sup> and CORUM<sup>21</sup> databases] between G1s and G2s in accordance with increasing  
148 C-score cutoff (**Fig. 2C**). The enriched functions include housekeeping functions such as  
149 regulating redox homeostasis, gene transcription, mRNA translation, as well as NTP  
150 synthesis (**Fig. 2D**). Moreover, some cancer-related pathways are also enriched in the C-  
151 score-identified buffering network, including the proto-oncogenes *EGFR* and *MYC* (**Fig. 2D**).  
152 Both duplicated and non-duplicated gene pairs contribute to the observed functional and PPI  
153 enrichments. However, notably, functional and PPI enrichment are primarily attributable to  
154 non-duplicated genes (compare **Fig. 2B and 2C** to **Fig. S3B and S3C**), indicating a strong  
155 likelihood for intrinsic buffering among analogous genes in the same pathway or proteins in  
156 the same protein complex. Thus, high C-score gene pairs are enriched in duplicated gene  
157 pairs, as well as non-duplicated gene pairs that are members of the same biological pathway  
158 and/or encode physically interacting proteins, supporting that CEBU (which is the basis of  
159 our C-score index) is the mechanism enabling intrinsic buffering between such gene pairs.

160

### 161 **Experimental validation of C-score-inferred CEBU gene pairs**

162 To validate putative C-score-inferred buffering gene pairs, we conducted experiments on the  
163 highest C-score gene pair, i.e., *FAM50A-FAM50B*, both members of which belong to the



164 same duplicated gene family. Based on a C-score plot of *FAM50A-FAM50B* (**Fig. 3A**), we  
165 expected that *FAM50B* would display a stronger buffering effect on *FAM50A* for cell lines  
166 located at the top-right of the plot (e.g. A549 and MCF7) relative to those at the bottom-left  
167 (e.g. U2OS). Accordingly, growth of the cell lines at the top-right of the plot would be more  
168 sensitive to dual suppression of *FAM50A* and *FAM50B*. We used gene-specific small hairpin  
169 RNAs (shRNAs) to suppress expression of *FAM50A* and *FAM50B*, individually and in  
170 combination. Consistent with our expectations, we observed stronger growth suppression in  
171 the A549 and MCF7 cell lines relative to the U2OS cell line (**Fig. 3B**). Next, we quantified  
172 *FAM50A* and *FAM50B* genetic interactions in these three different cell lines by Bliss score<sup>22</sup>,  
173 with lower scores indicating stronger synergistic interactions (see **Methods**). Indeed, the  
174 *FAM50A-FAM50B* gene pair in the A549 and MCF7 cell lines exhibited stronger synergy  
175 than in the U2OS cell line (Bliss score: 1.07 in A549, 1.06 in MCF7 and 1.44 in U2OS).  
176 Importantly, a recent study focusing on genetic interaction of duplicated genes identified the  
177 *FAM50A* and *FAM50B* gene pair as the most significant interacting duplicated gene pair in  
178 the human genome<sup>23</sup>, further supporting the inference power of our C-score index. Moreover,  
179 the A375 cell line was used in that recent study, and it is predicted to display strong synergy  
180 based on our C-score plot of *FAM50A* and *FAM50B* (**Fig. 3A**).

181

182 Although duplicated genes are well recognized for their buffering relationship, there is  
183 limited evidence supporting intrinsic buffering among non-duplicated genes. Thus, we sought  
184 to experimentally examine a pair of non-duplicated genes with a high C-score, so we targeted  
185 the *POP7-RPP25* pair. These two genes encode protein subunits of the ribonuclease P/MRP  
186 complex. In the C-score plot of *POP7-RPP25* (**Fig. 3C**), the HT29 cell line lies in the top-  
187 right region and the U2OS and LN18 cell lines are in the bottom-left region, indicating a  
188 likelihood for a stronger buffering effect in the HT29 cell line. When we suppressed

189 expression of *POP7* and *RPP25* using gene-specific shRNAs in these three cell lines, we  
190 observed that dual suppression of *POP7* and *RPP25* resulted in strong synergistic effects for  
191 the HT29 cell line but not for the U2OS or LN18 cell lines (Bliss scores for *POP7-RPP25*  
192 genetic interactions are 1.02 in HT29, 1.13 in U2OS, and 1.19 in LN18, **Fig. 3D**), indicating  
193 that C-score-inferred buffering gene pairs can be non-duplicated functional analogs in the  
194 same protein complex or duplicated genes of the same family.

195

### 196 **Tissue specificity of CEBU**

197 One key feature of intrinsic buffering is cross-cell variation in the expression of buffering  
198 genes (G2s), which contributes to cell-specific dependency of the buffered genes (G1s) (**Fig.**  
199 **1**). We hypothesized that the source of this cross-cell variation in G2 expression is embedded  
200 in the distinct transcriptional programs of different tissues. Therefore, we examined if the  
201 expression of high C-score G1s and G2s is tissue-specific. We calculated a tissue specificity  
202 index,  $\tau^{24}$ , for each gene to establish if it displays low (low  $\tau$ , broadly expressed across  
203 tissues) or high tissue specificity (high  $\tau$ , only expressed in one or a few specific tissues). As  
204 shown in **Figure 4A**, G2s generally presented higher tissue specificity compared to G1s  
205 (significant with *t*-test,  $p < 2.2e-16$ ) and compared to the control generated by randomly  
206 shuffling G2s across cell lines (**Fig. S4**). Together, these results indicate that G1s are  
207 generally expressed in the majority of cell types, whereas expression of G2s is more tissue-  
208 specific.

209

210 The pronounced tissue-specificity of G2 expression implies that CEBU acts as a type of  
211 tissue-specific intrinsic buffering. To further explore in which tissue types CEBU is more  
212 active, we generated normalized C-score plots for all high C-score gene pairs whereby the G1  
213 dependency scores across all cell lines were quantile-normalized to be between -1 and 0 and

214 the G2 expression values were normalized to be between 0 and 1 (**Fig. 4B**). We plotted these  
215 values against each other and then divided the resulting plot into nine equal regions by  
216 radiating lines out from zero (R1 to R9, **Fig. 4B**). As per the examples shown in **Fig. 3A, C**,  
217 tissue types displaying stronger CEBU-mediated buffering capacity would be enriched in the  
218 regions R1-R4, whereas those with low buffering capacity would predominate in regions R6-  
219 R9. Accordingly, considering a total of 29 tissue/cell types, we calculated the proportion of  
220 each tissue/cell type in each region of the plot in **Fig. 4B**, as well as the percentage of CEBU-  
221 enriched gene pairs for each tissue/cell type (see **Methods**). For each plot region, we  
222 observed that one to three tissue/cell types presented a high percentage of CEBU-enriched  
223 gene pairs (**Fig. 4C**). For example, for region R1, 98.0% of the CEBU-enriched gene pairs  
224 are highly expressed in cells derived from bone tissue (see grayscale ring surrounding the  
225 upper-left subplot of **Fig. 4C**), whereas region R9 encompasses a high percentage of  
226 strongly-expressing CEBU-enriched gene pairs in blood cells (lymphoma: 13.9%, leukemia:  
227 10.6%, and multiple myeloma: 9.2%, see grayscale ring surrounding the bottom-right subplot  
228 of **Fig. 4C**). We also noted a few reoccurring tissue/cell types across regions of the plot  
229 reflecting high buffering capacity (central nervous system in R2, R3, and R4) or in low  
230 buffering regions (leukemia in R7, R8, and R9; lymphoma in R8 and R9) (**Fig. 4C**),  
231 indicating that particular tissue/cell types display a propensity for CEBU activity. These  
232 results support that CEBU reflects tissue-specific intrinsic buffering, and that whereas  
233 buffered G1s are generally expressed across tissue types, the buffering G2s are expressed in  
234 specific tissue/cell types, thereby contributing to tissue-specific functions.

235

### 236 **Harnessing C-score to calculate the buffering capacity of CEBU**

237 As revealed by our experimental results in **Figure 3**, cell lines located in the upper right of a  
238 C-score plot are more sensitive to dual gene suppression, indicating a higher buffering

239 capacity from G2s. To quantify G2 buffering capacities in various cells or tissues, we  
240 calculated buffering capacities as the relative G2 expression (compared to that of all other  
241 cell lines) of the cell line of interest adjusted by the C-score of the gene pair (**Fig. 5A** and  
242 **Methods**). We validated these C-score-derived buffering capacities as predictions of genetic  
243 interactions between G1 and G2 using experimental results from four independent studies in  
244 human cells (**Table S1**)<sup>25-28</sup>. Using the receiver operating characteristic (ROC) curve to  
245 assess the performance of buffering capacity predictions, we observed that the resulting area  
246 under curve (AUC) is significantly larger than random (Mann-Whitney U test with  $p$ -value <  
247 0.05, **Fig. 5B**). Furthermore, predictive performance increased for higher C-score cutoffs, as  
248 indicated by their increasing AUC (**Fig. 5B**). Moreover, the buffering capacity of CEBU is  
249 quantitatively correlated with the strength of genetic interaction. We observed a negative  
250 correlation between C-score-derived buffering capacities and experimentally validated  
251 genetic interactions (C-score cutoff = 0.25, correlation = -0.231,  $p$ -value = 0.034, **Fig. S5A**),  
252 and this correlation is stronger for higher C-score cutoffs (**Fig. S5B**). Even though this  
253 correlation coefficient of -0.231 is not strong (although it is statistically significant), the  
254 intrinsic variability associated with collating experimental results from four independent  
255 studies must be considered a contributory factor to weakening that correlation<sup>25-28</sup>. Moreover,  
256 predictions of genetic interactions based on CEBU buffering capacity are robust even when  
257 different thresholds for calculating buffering capacity are applied (**Methods** and **Fig. S5C**).  
258 Accordingly, the CEBU mechanism can be used to infer genetic interactions in human cells.  
259 Since CEBU is reflective of tissue-specific intrinsic buffering (**Fig. 4**), we also quantified  
260 buffering capacity in various tissue/cell types. We calculated the average buffering capacity  
261 for each tissue/cell type based on high C-score gene pairs (**Fig. 5C**). In line with our  
262 enrichment analysis presented in **Figure 4**, the top three most buffered tissues are the central  
263 nervous system, bone and the peripheral nervous system. In contrast, blood cells—including

264 multiple myeloma, lymphoma, and leukemia cell lines—exhibited the lowest buffering  
265 capacities.

266

### 267 **CEBU-mediated buffering capacity is indicative of cancer aggressiveness**

268 Inspired by the proto-oncogenes we identified according to C-scores (**Fig. 2D**), we wondered  
269 if cancers in various tissues may take advantage of the buffering capacities endowed by the  
270 CEBU mechanism for robust proliferation. In other words, would higher CEBU-mediated  
271 buffering capacity render cancers more robust and aggressive, thereby resulting in a poorer  
272 prognosis? To test this hypothesis, we established a “ground-truth” of expression-based  
273 cancer patient prognosis by analyzing patient gene expression and survival data for all 30  
274 available cancer types from The Cancer Genome Atlas (TCGA) <sup>29</sup>. Here, we assessed  
275 differential patient survival against gene expression using Cox regression and controlling for  
276 clinical characteristics including age, sex, pathological stage, clinical stage, and tumor grade,  
277 followed by multiple testing correction (false discovery rate < 0.2). Then, we examined the  
278 performance of CEBU-mediated buffering capacity in terms of predicting the ground-truth  
279 dataset. As an example, in **Figure 6A** we present potential buffering to *NAMPT* of the NAD<sup>+</sup>  
280 salvage pathway, where cancers may be addicted to this pathway <sup>30</sup>. We discovered that the  
281 *NAMPT-CALDI* gene pair, comprising the *NAMPT* dependency score and *CALDI* gene  
282 expression, demonstrate a high C-score of 0.446, and its CEBU-mediated buffering capacity  
283 is high in CNS but low in blood cells. When we stratified patients based on *CALDI*  
284 expression, we observed a considerable difference in survival for patients suffering lower  
285 grade glioma (LGG – a cancer of the CNS, see **Table S2** for cross-referencing between cell  
286 lines and TCGA cancers and for the full names of cancer abbreviations), but not for patients  
287 with acute myeloid leukemia (LAML – a cancer of the blood, **Fig. 6B** left panel for LGG and  
288 right panel for LAML). Mean CEBU-mediated buffering capacity for the *NAMPT:CALDI*

289 gene pair is 1.47 in the CNS (i.e. tissue/cell types displaying strong buffering capacity), but  
290 only -0.88 in leukemic blood cells (i.e. exhibiting weak buffering capacity) (**Fig. 6A**). Thus,  
291 based on our ground-truth dataset, the buffering capacity of the *NAMPT* and *CALD1* gene  
292 pair in different tissue/cell types can be used to predict patient survival for specific cancer  
293 types.

294

295 We systematically assessed how buffering capacity from C-score-identified gene pairs could  
296 help predict cancer patient survival for all 30 TCGA cancer types. We found that for 15 of  
297 those cancers, at least 1% of genes across the genome can predict patient survival (with  
298 statistical significance assessed by Mann-Whitney U test), and for 8 of those 15 cancer types,  
299 the performance of CEBU-mediated buffering capacity for at least one C-score cutoff was  
300 significantly better than random (AUC > 0.5, false discovery rate < 0.2) (**Fig. 6C**). In  
301 addition, CEBU-mediated buffering capacity is also predictive of pathological stage (**Fig.**  
302 **S6A**), clinical stage (**Fig. S6B**), and tumor grade (**Fig. S6C**) for multiple cancer types. In  
303 general, buffering capacity-based predictions performed better for higher C-score cutoffs.  
304 Taken together, our results show that the CEBU-mediated buffering capacity derived from  
305 our C-score index can be indicative of cancer aggressiveness, as illustrated by patient  
306 survival, cancer pathological stage, clinical stage and tumor grade.

307

## 308 **Discussion**

309 In multicellular organisms, different cells and tissues conduct various functions via  
310 specialized cellular structures and/or according to specific states (e.g., signaling and/or  
311 metabolic states) by regulating cell- and tissue-specific gene expression. Our study indicates  
312 that this cell- and tissue-specific gene expression not only contributes directly to tissue-  
313 specific functions, but also allows buffering for functional enhancement. This type of

314 functional buffering, which we have termed cell-specific expression buffering (CEBU), can  
315 enhance housekeeping functions in specific tissues, thereby enabling tissue homeostasis.  
316 Furthermore, it appears to be especially prevalent in tissues of low regenerative capacity (e.g.,  
317 bone and neuronal tissues) and it can promote tumor aggressiveness based on cancer patient  
318 survival. Although functional buffering has long been known as critical to biological  
319 robustness, the mechanisms underlying functional buffering remain largely unknown<sup>3</sup>.  
320 CEBU that we illustrate in the present study represents a possible buffering mechanism in  
321 multicellular organisms that is critical for tissue homeostasis and cancer robustness.

322

323 One key feature of CEBU is the distinct patterns of expression and dependency (essentiality)  
324 between the buffered genes (G1s) compared to buffering genes (G2). In general, G1s tend to  
325 be broadly expressed with stronger dependency, whereas expression of G2s is more tissue-  
326 specific and less essential (**Fig. 4A and S2C**). Generally, the essentiality of genes is  
327 correlated with their expression level and tissue specificity<sup>31-33</sup>. Housekeeping genes that are  
328 broadly expressed in most cells exhibit stronger essentiality. In contrast, genes expressed in  
329 specific cell types are considered to have weaker essentiality. Here, CEBU represents a  
330 putative mechanistic link between these two types of genes (i.e., housekeeping and tissue-  
331 specific genes), enabling their cooperation to regulate cellular functions via functional  
332 buffering. Specifically, house-keeping functions like metabolism, transcription, translation,  
333 and cell-cycle-related processes are highly enriched among high C-score gene pairs (**Fig. 2D**),  
334 indicating that house-keeping functions can be robustly maintained via CEBU-mediated  
335 functional buffering.

336

337 As a cell- and tissue-specific buffering mechanism, CEBU may endow buffering capacity on  
338 specific cells/tissues in order to maintain their functions and survival. This enhancement of

339 cellular robustness may allow cells to persist for a longer time-period, in some cases even  
340 throughout the lifespan of an organism. As a result, CEBU may compensate for the lack of  
341 regenerative capacity in certain tissues. We predicted neuronal and bone tissues to have the  
342 strongest CEBU-mediated buffering capacities (**Fig. 4C** and **5C**), both of which exhibit  
343 relatively low regenerative capacities<sup>34-36</sup>. In contrast, human blood cells, which are fully  
344 regenerated in 4 to 8 weeks<sup>37</sup>, are predicted to have the weakest buffering capacities (**Fig.**  
345 **5C**). Therefore, it is tempting to speculate that cell types of weaker regenerative capacities,  
346 such as neurons, need to sustain robust cellular functions through the buffering afforded by  
347 CEBU, thereby maintaining their tissue homeostasis. In contrast, highly regenerative tissues  
348 are frequently replaced, so they have less need for functional buffering.

349

350 Unlike the needs-based buffering mechanism, whereby the buffering gene is only activated  
351 when its buffered function is compromised, the CEBU-mediated intrinsic buffering proposed  
352 herein maintains a constitutively active state with cell- and tissue-specificity. Since the  
353 buffering gene (G2) is continuously expressed, there is no need for a control system to  
354 monitor if a function has been compromised and to activate the expression of the buffering  
355 genes. As a result, no response time is needed for intrinsic buffering, unlike for needs-based  
356 buffering. Accordingly, the CEBU mechanism can enable or adjust buffering capacity by  
357 regulating the expression of buffering genes via cell- or tissue-specific epigenetic regulators.  
358 Thus, CEBU can buffer housekeeping functions that need to be performed constitutively,  
359 which differs from the needs-based buffering that is mostly characterized as stress-responsive  
360<sup>38</sup>. Overall then, CEBU describes a simple, efficient and potentially versatile mechanism for  
361 functional buffering in humans and potentially other multicellular organisms.

362



363 CEBU describes an intrinsic buffering mechanism that functions under normal physiological  
364 conditions. Consistent with this notion, when we examined if our C-score index could be  
365 biased due to our usage of cancer cell lines, we found that only a low percentage (2.3% per  
366 gene pair, **Fig. S7A**) of mutant cell lines contributed to our C-score measurements. Moreover,  
367 excluding mutant cell lines did not qualitatively affect our C-score measurements, especially  
368 for high C-score gene pairs (**Fig. S7B**). The same trend holds for cancer-related genes (**Fig.**  
369 **S7B**). These results indicate that mutant cell lines are not the major determinants of C-scores.  
370 Similarly, since copy number variation (CNV) is a major mechanism for oncogenic  
371 expression, we checked if CNV contributes to G2 expression. As shown in **Figure S7C**, the  
372 correlation between G2 expression and copy number decreases with increasing C-score,  
373 indicating that CNV is not a primary mechanism regulating G2 expression. Thus, our C-score  
374 index is likely not biased by the utilization of cancer cell lines.

375

376 We observed an enrichment of duplicated genes among high C-score gene pairs, supporting  
377 the notion that duplicated genes contribute to the context-dependent essentiality of their  
378 paralogous genes<sup>11-13</sup>. In addition to duplicated genes, our C-score index identified a high  
379 percentage of non-duplicated gene pairs with high buffering capacities (**Fig. S3A**), and these  
380 non-duplicated gene pairs tend to belong to the same pathways and/or protein complexes (**Fig.**  
381 **2B** and **2C**). Therefore, it is possible that many of these G1s and G2s represent non-  
382 orthologous functional analogs. One simple scenario could be that G1 and G2 physically  
383 interact with each other to form a protein complex, wherein G1's function can be structurally  
384 substituted by G2. Indeed, we identified the *POP7* and *RPP25* gene pair as an example of  
385 this scenario (**Fig. 3C** and **3D**). More sophisticated and indirect functional buffering can also  
386 occur between G1s and G2s given the complex interactions among biological functions<sup>39</sup>.

387 We expect that CEBU exerts buffering effects through additional types of molecular  
388 interactions, which remain to be tested experimentally.

389

390 C-score-derived cell-specific buffering capacities comply well with experimentally validated  
391 genetic interactions in human cells (**Fig. 5B** and **Fig. S5**), indicating that CEBU may  
392 represent a critical mechanism for synthetic lethality in human cells. In practice, it remains a  
393 daunting challenge to systematically characterize genetic interactions in organisms with  
394 complex genomes due to large numbers of possible gene pairs, i.e. ~200 million gene pairs in  
395 humans. Previous efforts have used computational approaches on conserved synthetically  
396 lethal gene pairs in the budding yeast *Saccharomyces cerevisiae* or employ data mining on  
397 multiple large datasets to infer human synthetic lethality<sup>40,41</sup>. Nevertheless, predictions  
398 emanating from different studies exhibit little overlap<sup>42</sup>, evidencing the marked complexity  
399 of synthetic lethality in humans. The CEBU mechanism proposed here can contribute both  
400 experimentally and computationally to a better characterization of human genetic interactions.

401

402 Using G2 expression of a high C-score gene pair to stratify cancer patients, we observed a  
403 significant difference in cancer patient survival, indicating that stronger CEBU-mediated  
404 buffering capacity could be predictive of cancer aggressiveness in patients (see **Fig. 6A** and  
405 **6B** for an example). Indeed, buffering capacity helped predict cancer patient survival in 8 of  
406 15 cancer types and, generally, predictive performance was better for higher C-score cutoffs  
407 (**Fig. 6C**). Apart from patient survival, buffering capacity is also indicative of pathological  
408 stage, clinical stage, and tumor grade of cancers (**Fig. S6**). These results support our  
409 hypothesis that stronger buffering capacity via higher G2 expression contributes to cancer  
410 robustness in terms of proliferation and drug resistance. Given the complexity of cancers, it is  
411 surprising to see such general predictivity of cancer prognosis by individual high C-score

412 gene pairs. Accordingly, we suspect that some cancer cells may adopt this cell- and tissue-  
413 specific buffering mechanism to enhance their robustness in proliferation and stress responses  
414 by targeting the expression of buffering genes. Clinically, the expression of such buffering  
415 genes could represent a unique feature for evaluating cancer progression when applied  
416 alongside other currently used clinical characteristics. Finally, experimental validation of C-  
417 score-predicted genetic interactions will help identify potential drug targets for tailored  
418 combination therapy against specific cancers.

419

## 420 **Materials and Methods**

### 421 **Retrieval and processing of dependency score and gene expression data**

422 Data on dependency scores and CCLE (Cancer Cell Line Encyclopedia) gene expression  
423 were downloaded from the DepMap database (DepMap Public 19Q4) <sup>15,16</sup>. Dependency  
424 scores modeled from the CERES computational pipeline based on a genome-wide CRISPR  
425 loss-of-function screening were selected. CCLE expression data was quantified as log<sub>2</sub> TPM  
426 (Transcripts Per Million) using RSEM (RNA-seq by Expectation Maximization) with a  
427 pseudo-count of 1 in the GTEx pipeline (<https://gtexportal.org/home/documentationPage>).  
428 Only uniquely mapped reads in the RNA-seq data were used in the GTEx pipeline.  
429 Integrating and cross-referencing of the dependency score and gene expression datasets  
430 yielded 18239 genes and 684 cell lines. Genes lacking dependency scores for any one of the  
431 684 cell lines were discarded from our analyses.

432

### 433 **C-score calculation**

434 Our C-score index integrates the dependency scores of buffered genes (G1) and the gene  
435 expression of buffering genes (G2) to determine the buffering relationship between gene  
436 pairs. Genes with mean dependency scores > 0 or mean gene expression < 0.5 log<sub>2</sub> TPM were

437 discarded, yielding 9196 G1s and 13577 G2s. The C-score integrates the correlation ( $\rho$ ) and  
438 slope between the dependency score of gene  $G1$  and the gene expression of gene  $G2$ , defined  
439 as:

440

$$441 \quad \text{C-score} = \rho_{G1,G2} \left( 1 + b \frac{\text{slope}_{min}}{\text{slope}_{G1,G2}} \right)$$

442

443 where  $\rho$  denotes the Pearson correlation coefficient and  $\text{slope}_{min}$  denotes the minimum slope  
444 of all considered gene pairs that present a statistically significant positive correlation. The  
445 normalized slope can be weighted by cell- and tissue-type specific  $b$ . In our analysis,  $b$  is set  
446 as 1 for a pan-cell or pan-cancer analysis.

447

#### 448 **Duplicated gene assignment**

449 Information on gene identity was obtained from ENSEMBL (release 98, reference genome  
450 GRCh38.p13)<sup>43</sup>. Two genes are considered duplicated genes if they have diverged from the  
451 same duplication event.

452

#### 453 **Enrichment analysis for buffering gene pairs**

454 For enrichment analysis of gene pairs, we adopted a previously described methodology<sup>44</sup>.  
455 Briefly, GO and KEGG gene sets were downloaded from the Molecular Signatures Database  
456 (<https://www.gsea-msigdb.org/gsea/msigdb/>). The number of total possible gene pairs is 9196  
457 ( $G1$ ) x 13577 ( $G2$ ). The condition of  $G1$  and  $G2$  being the same gene was excluded as a  
458 potential buffering gene pair under all C-score cutoffs. Enrichment was calculated as:

$$\log \frac{\frac{e_{ac}}{e_a}}{\frac{e_c}{e_t}}$$

459 where  $e_{ac}$  represents the number of gene pairs that are both annotated and with buffering  
460 capability,  $e_a$  is the number of annotated gene pairs,  $e_c$  is the number of buffering gene pairs,  
461 and  $e_t$  is the total number of gene pairs.

462 Protein-protein interaction (PPI) data was downloaded from the STRING database (version  
463 11)<sup>20</sup>. Only high-confidence interactions (confidence > 0.7) in human were considered. The  
464 STRING database determines confidence by approximating the probability that a link exists  
465 between two enzymes in the KEGG database. Data on protein core complexes were  
466 downloaded from CORUM (<http://mips.helmholtz-muenchen.de/corum>). The enrichment  
467 calculation is the same as for GO and KEGG, except that  $e_{ac}$  represents the number of gene  
468 pairs that have PPI or are in the same complex and have buffering capability, and  $e_a$  is the  
469 number of gene pairs that have PPI or are in the same complex.

470

### 471 **Construction of our Human Compensatory Gene Network**

472 The directional human compensatory gene network was constructed from gene pairs  
473 exhibiting high C-scores (> 0.25). For illustration, isolated subnetworks are not shown. We  
474 visualized the network using Cytoscape (<https://cytoscape.org/>) and MATLAB. GO  
475 enrichment was conducted on each cluster using g:Profiler<sup>45</sup>. To identify functionally-related  
476 gene clusters in the human compensatory gene network, the genes with enriched functions  
477 were inputted into the SAFE algorithm<sup>46</sup>. The neighbor radius was determined by regional  
478 enrichment of sub-networks for each GO-enriched function.

479

### 480 **Experimental validation**

481 A549, H4, HT29, LN18, MCF7, and U2OS cell lines were selected based on their  
482 distribution across the C-score plots (**Fig. 3A and 3C**), indicating different buffering  
483 capacities. All cell lines were purchased from ATCC and they were cultured in Dulbecco's

484 Modified Eagle Media (H4 and LN18), Ham's F-12K Medium (A549), or RPMI 1640 media  
485 (HT29, MCF7, and U2OS) supplemented with 5% fetal bovine, serum, 100 U/mL penicillin,  
486 100 µg/mL streptomycin, and 250 ng/mL fungizone (Gemini Bio-Products). Cell growth was  
487 monitored by time-lapse imaging using Incucyte Zoom, taking images every 2 hours for 2-4  
488 days. To suppress *FAM50A*, *FAM50B*, *POP7* and *RPP25* expression, lentivirus-based  
489 shRNAs were delivered individually or in combination. The gene-specific shRNA sequences  
490 are: *FAM50A* - CCAACATTGACAAGAAGTTCT and GAGCTGGTACGAGAAGAACAA;  
491 *FAM50B* – CACCTTCTACGACTTCATCAT; *POP7* – CTTCAGGGTCACACCCAAGTA  
492 and CGGAGACCCAATGACATTTAT; and *RPP25* – CCAGCGTCCAAGAGGAGCCTA.  
493 To ensure better knockdown of gene expression, shRNAs were delivered twice (7 days and 4  
494 days before seeding). Equal numbers of cells were seeded for cell growth measurements by  
495 time-lapse imaging using Incucyte Zoom. The lentivirus-based shRNAs were purchased from  
496 the RNAi core of Academia Sinica. The growth rate under each condition was measured by  
497 fitting cell confluence to an exponential growth curve using the Curve Fitting Toolbox in  
498 MATLAB.

499

### 500 **Bliss independence model**

501 Cytotoxic synergy was measured using the Bliss independent model<sup>22</sup>. The Bliss model is  
502 presented as a ratio of the expected additive effect to the observed combinatorial effect:

$$E_{bliss} = \frac{E_A + E_B - E_A \times E_B}{E_{AB}}$$

503 where  $E$  is the effect of drug  $A$ ,  $B$ , or a combination of  $A$  and  $B$ . Effect was measured by the  
504 relative cell growth, based on the fold-change of confluency between 0 and 72 hours upon  
505 suppression of *FAM50A* and *FAM50B* or suppression of *POP7* and *RPP25* in all cell lines  
506 except MCF7, and between 0 and 96 hours upon suppression of *FAM50A* and *FAM50B* in  
507 MCF7.

508

## 509 **Cell-specific buffering capacity and comparison to experimental genetic interactions**

510 Cell-specific buffering capacity was derived from the C-score of a given gene pair and gene  
511 expression of the buffering gene (G2) in the cell line of interest following the equation:

512

$$\text{buffering capacity} = \frac{\text{cell line expression} - 25^{\text{th}} \text{ percentile of all expression (G2)}}{\text{slope}_{mod}}$$

$$\text{where } \text{slope}_{mod} = \text{C-score} \times \frac{\text{sd(G2 expression)}}{\text{sd(G1 dependency)}}$$

513

514 where *sd* = standard deviation. The 25<sup>th</sup> percentile cutoff for expression is determined  
515 empirically, although different percentile cutoffs do not qualitatively affect the measurements  
516 of buffering capacities (**Fig. 5A**).

517 Combinatorial CRISPR screen-derived genetic interaction scores were pooled from four  
518 literature sources<sup>25-28</sup> (**Table S1**). We only considered cell lines that appear in DepMap  
519 CERES 19Q4. There were two C-scores for each gene-pair of the experimental dataset (either  
520 gene could be a G1), and we assigned the higher C-score for that gene-pair. Overall, we  
521 curated 10,222 genetic interaction scores in various cell lines from the literature, and 1986  
522 out of 10,222 genetic interaction scores had a C-score > 0.1. To evaluate the validity of  
523 buffering capacity, we generated a ground-truth dataset by assigning gene-pairs with a  
524 positive genetic interaction as false for buffering and a negative genetic interaction as true for  
525 buffering. The qualitative performance of buffering capacity against this ground-truth dataset  
526 was assessed by ROC curve. Additionally, we correlated the buffering capacity directly via a  
527 ground-truth genetic interaction score for quantitative evaluation.

528

## 529 **Tissue specificity**

530 To calculate tissue-specificity, cell lines were grouped by their respective tissues, and  
531 expression of genes in cell lines of the same tissue were averaged. Tissue specificity was  
532 calculated as tau ( $\tau$ )<sup>24</sup>, where  $\tau$  is defined as:

533

$$\tau = \frac{\sum_{i=1}^N (1 - \frac{x_i}{x_{max}})}{N - 1}$$

534

535 with  $N$  denoting the number of tissues,  $x_i$  denoting the expression of a gene, and  $x_{max}$  denoting  
536 the highest gene expression across all tissues. Note, expression values were log-transformed,  
537 so  $\log_2 \text{TPM} < 1$  was considered as 0 in tissue specificity calculations<sup>47</sup>.

538

### 539 **Cancer-specific survival prediction according to C-score gene pairs**

540 Gene expression and survival data from The Cancer Genome Atlas (TCGA)<sup>29</sup> was retrieved  
541 from Xena<sup>48</sup>. The DepMap cancer cell lines were mapped to TCGA cancers based on the  
542 annotation in **Table S2** (cancers that do not have a matched cancer type in CERES 19Q4  
543 were not analyzed). To systematically analyze cancer prognosis, we first performed a  
544 multiple test correction on the  $p$ -values from Cox regression controlling for age, sex,  
545 pathological stage, clinical stage and tumor grade. We calculated the false discovery rate  
546 (FDR) using the Benjamini–Hochberg procedure with a threshold  $< 0.2$ . The ground-truth  
547 table for each cancer was constructed using the adjusted  $p$ -value. AUC of ROC curves were  
548 used to assess the performance of survival based on buffering capacity. AUCs and ROCs  
549 were generated using python and R. The statistical significance of AUC was assessed by  
550 Mann-Whitney U test<sup>49</sup> to evaluate if gene expression with a positive Cox coefficient (poorer  
551 prognosis) reflected significantly higher buffering capacities in each cancer with different C-  
552 score cut-offs. The  $p$ -values of the Mann-Whitney U test were adjusted using the Benjamini-



553 Hochberg procedure with a threshold  $< 0.2$ . We conducted a similar approach to the  
554 prognosis analysis for buffering capacities and clinical features. We calculated the p-values  
555 of correlations between gene expression and clinical features, staging and grade, and  
556 corrected the p-values using the Benjamini-Hochberg procedure with a threshold  $< 0.2$ . We  
557 then used Mann-Whitney U tests to evaluate if gene pairs with a significant positive  
558 correlation between gene expression and tumor aggressiveness presented a significantly  
559 higher buffering capacity in each cancer for different C-score cut-offs.

560

### 561 **Data Availability**

562 All high C-score ( $> 0.25$ ) gene pairs (<https://figshare.com/s/6f8929c6543687a6062f>) and  
563 programming code (<https://figshare.com/s/b778489bb2f6fc3b0069>) are available in the  
564 FigShare repository.

565

### 566 **Acknowledgement**

567 We thank members of the Lab for Cell Dynamics for helpful discussions. We are grateful to  
568 Jose Reyes, Hannah Katrina Co, and Jun-Yi Leu for their comments and suggestions on the  
569 manuscript, and Ann Mikaela Lynne Ong Co, Su-Ping Lee, the Imaging Core at the Institute  
570 of Molecular Biology, and the RNAi Core at Academia Sinica for their technical support.

571

### 572 **Author Contributions**

573 H.-K.L., J.-H.C., and S.-h.C. conceived the project. H.-K.L., J.-H.C., C.-C.W., and S.-h.C.  
574 designed and conducted the computational and statistical analyses. H.-K.L., J.-H.C., C.-C.W.,  
575 and S.-h.C. wrote the manuscript. F.-S.H., C.D. and S.-h.C. designed the experiments, and F.-  
576 S.H., and C.D. conducted the experiments.

577

578 **Conflict of Interests**

579 J.-H.C. is an employee of ACT Genomics

580

581 **References**

582

- 583 1 Kitano, H. Biological robustness. *Nat Rev Genet* **5**, 826-837, doi:10.1038/nrg1471  
584 (2004).
- 585 2 Masel, J. & Siegal, M. L. Robustness: mechanisms and consequences. *Trends Genet*  
586 **25**, 395-403, doi:10.1016/j.tig.2009.07.005 (2009).
- 587 3 El-Brolosy, M. A. & Stainier, D. Y. R. Genetic compensation: A phenomenon in search  
588 of mechanisms. *PLoS Genet* **13**, e1006780, doi:10.1371/journal.pgen.1006780 (2017).
- 589 4 Diss, G., Ascencio, D., DeLuna, A. & Landry, C. R. Molecular Mechanisms of  
590 Paralogous Compensation and the Robustness of Cellular Networks. *J Exp Zool Part B*  
591 **322**, 488-499, doi:10.1002/jez.b.22555 (2014).
- 592 5 El-Brolosy, M. A. *et al.* Genetic compensation triggered by mutant mRNA degradation.  
593 *Nature* **568**, 193-+, doi:10.1038/s41586-019-1064-z (2019).
- 594 6 Kafri, R., Bar-Even, A. & Pilpel, Y. Transcription control reprogramming in genetic  
595 backup circuits. *Nat Genet* **37**, 295-299, doi:10.1038/ng1523 (2005).
- 596 7 Diss, G., Ascencio, D., DeLuna, A. & Landry, C. R. Molecular mechanisms of  
597 paralogous compensation and the robustness of cellular networks. *J Exp Zool B Mol*  
598 *Dev Evol* **322**, 488-499, doi:10.1002/jez.b.22555 (2014).
- 599 8 Kafri, R., Levy, M. & Pilpel, Y. The regulatory utilization of genetic redundancy through  
600 responsive backup circuits. *P Natl Acad Sci USA* **103**, 11653-11658,  
601 doi:10.1073/pnas.0604883103 (2006).
- 602 9 Kafri, R., Springer, M. & Pilpel, Y. Genetic Redundancy: New Tricks for Old Genes. *Cell*  
603 **136**, 389-392, doi:10.1016/j.cell.2009.01.027 (2009).
- 604 10 Koonin, E. V., Mushegian, A. R. & Bork, P. Non-orthologous gene displacement.  
605 *Trends Genet* **12**, 334-336 (1996).
- 606 11 Wang, T. *et al.* Identification and characterization of essential genes in the human  
607 genome. *Science* **350**, 1096-1101, doi:10.1126/science.aac7041 (2015).
- 608 12 Dandage, R. & Landry, C. R. Paralog dependency indirectly affects the robustness of  
609 human cells. *Mol Syst Biol* **15**, e8871, doi:10.15252/msb.20198871 (2019).
- 610 13 De Kegel, B. & Ryan, C. J. Paralog buffering contributes to the variable essentiality of  
611 genes in cancer cell lines. *PLoS Genetics* **15**, doi:ARTN e1008466  
612 10.1371/journal.pgen.1008466 (2019).
- 613 14 Vu, V. *et al.* Natural Variation in Gene Expression Modulates the Severity of Mutant  
614 Phenotypes. *Cell* **162**, 391-402, doi:10.1016/j.cell.2015.06.037 (2015).
- 615 15 Ghandi, M. *et al.* Next-generation characterization of the Cancer Cell Line  
616 Encyclopedia. *Nature* **569**, 503-+, doi:10.1038/s41586-019-1186-3 (2019).
- 617 16 Meyers, R. M. *et al.* Computational correction of copy number effect improves  
618 specificity of CRISPR-Cas9 essentiality screens in cancer cells. *Nature Genetics* **49**,  
619 1779-+, doi:10.1038/ng.3984 (2017).
- 620 17 Ashburner, M. *et al.* Gene ontology: tool for the unification of biology. The Gene

- 621           Ontology Consortium. *Nat Genet* **25**, 25-29, doi:10.1038/75556 (2000).
- 622   18       Kanehisa, M. & Goto, S. KEGG: kyoto encyclopedia of genes and genomes. *Nucleic*  
623       *Acids Res* **28**, 27-30, doi:10.1093/nar/28.1.27 (2000).
- 624   19       Subramanian, A. *et al.* Gene set enrichment analysis: a knowledge-based approach  
625       for interpreting genome-wide expression profiles. *Proc Natl Acad Sci U S A* **102**,  
626       15545-15550, doi:10.1073/pnas.0506580102 (2005).
- 627   20       von Mering, C. *et al.* STRING: known and predicted protein-protein associations,  
628       integrated and transferred across organisms. *Nucleic Acids Res* **33**, D433-437,  
629       doi:10.1093/nar/gki005 (2005).
- 630   21       Ruepp, A. *et al.* CORUM: the comprehensive resource of mammalian protein  
631       complexes--2009. *Nucleic Acids Res* **38**, D497-501, doi:10.1093/nar/gkp914 (2010).
- 632   22       Bliss, C. I. The toxicity of poisons applied jointly. *Annals of Applied Biology* **26**, 585-  
633       615 (1939).
- 634   23       Thompson, N. A. *et al.* Combinatorial CRISPR screen identifies fitness effects of gene  
635       paralogues. *Nat Commun* **12**, 1302, doi:10.1038/s41467-021-21478-9 (2021).
- 636   24       Yanai, I. *et al.* Genome-wide midrange transcription profiles reveal expression level  
637       relationships in human tissue specification. *Bioinformatics* **21**, 650-659,  
638       doi:10.1093/bioinformatics/bti042 (2005).
- 639   25       Rosenbluh, J. *et al.* Genetic and Proteomic Interrogation of Lower Confidence  
640       Candidate Genes Reveals Signaling Networks in beta-Catenin-Active Cancers. *Cell Syst*  
641       **3**, 302+, doi:10.1016/j.cels.2016.09.001 (2016).
- 642   26       Shen, J. P. *et al.* Combinatorial CRISPR-Cas9 screens for de novo mapping of genetic  
643       interactions. *Nat Methods* **14**, 573+, doi:10.1038/nmeth.4225 (2017).
- 644   27       Najm, F. J. *et al.* Orthologous CRISPR-Cas9 enzymes for combinatorial genetic screens.  
645       *Nat Biotechnol* **36**, 179-189, doi:10.1038/nbt.4048 (2018).
- 646   28       Zhao, D. *et al.* Combinatorial CRISPR-Cas9 Metabolic Screens Reveal Critical Redox  
647       Control Points Dependent on the KEAP1-NRF2 Regulatory Axis. *Mol Cell* **69**, 699-708  
648       e697, doi:10.1016/j.molcel.2018.01.017 (2018).
- 649   29       Hoadley, K. A. *et al.* Cell-of-Origin Patterns Dominate the Molecular Classification of  
650       10,000 Tumors from 33 Types of Cancer. *Cell* **173**, 291-304 e296,  
651       doi:10.1016/j.cell.2018.03.022 (2018).
- 652   30       Heske, C. M. Beyond Energy Metabolism: Exploiting the Additional Roles of NAMPT  
653       for Cancer Therapy. *Front Oncol* **9**, 1514, doi:10.3389/fonc.2019.01514 (2019).
- 654   31       Hastings, K. E. M. Strong evolutionary conservation of broadly expressed protein  
655       isoforms in the troponin I gene family and other vertebrate gene families. *J Mol Evol*  
656       **42**, 631-640, doi:Doi 10.1007/Bf02338796 (1996).
- 657   32       Subramanian, S. & Kumar, S. Gene expression intensity shapes evolutionary rates of  
658       the proteins encoded by the vertebrate genome. *Genetics* **168**, 373-381,  
659       doi:10.1534/genetics.104.028944 (2004).
- 660   33       Zhang, L. Q. & Li, W. H. Mammalian housekeeping genes evolve more slowly than  
661       tissue-specific genes. *Mol Biol Evol* **21**, 236-239, doi:10.1093/molbev/msh010 (2004).
- 662   34       Iismaa, S. E. *et al.* Comparative regenerative mechanisms across different  
663       mammalian tissues. *Npj Regen Med* **3**, doi:ARTN 6  
664       10.1038/s41536-018-0044-5 (2018).
- 665   35       Fawcett, J. W. The Struggle to Make CNS Axons Regenerate: Why Has It Been so  
666       Difficult? *Neurochem Res* **45**, 144-158, doi:10.1007/s11064-019-02844-y (2020).
- 667   36       Schmidt-Bleek, K., Petersen, A., Dienelt, A., Schwarz, C. & Duda, G. N. Initiation and

- 668 early control of tissue regeneration - bone healing as a model system for tissue  
669 regeneration. *Expert Opin Biol Th* **14**, 247-259, doi:10.1517/14712598.2014.857653  
670 (2014).
- 671 37 Biechonski, S., Yassin, M. & Milyavsky, M. DNA-damage response in hematopoietic  
672 stem cells: an evolutionary trade-off between blood regeneration and leukemia  
673 suppression. *Carcinogenesis* **38**, 367-377, doi:10.1093/carcin/bgx002 (2017).
- 674 38 DeLuna, A., Springer, M., Kirschner, M. W. & Kishony, R. Need-Based Up-Regulation of  
675 Protein Levels in Response to Deletion of Their Duplicate Genes. *Plos Biol* **8**, doi:ARTN  
676 e1000347  
677 10.1371/journal.pbio.1000347 (2010).
- 678 39 Rancati, G., Moffat, J., Typas, A. & Pavelka, N. Emerging and evolving concepts in  
679 gene essentiality. *Nat Rev Genet* **19**, 34-49, doi:10.1038/nrg.2017.74 (2018).
- 680 40 Jerby-Arnon, L. *et al.* Predicting cancer-specific vulnerability via data-driven detection  
681 of synthetic lethality. *Cell* **158**, 1199-1209, doi:10.1016/j.cell.2014.07.027 (2014).
- 682 41 Srivas, R. *et al.* A Network of Conserved Synthetic Lethal Interactions for Exploration  
683 of Precision Cancer Therapy. *Molecular Cell* **63**, 514-525,  
684 doi:10.1016/j.molcel.2016.06.022 (2016).
- 685 42 Liu, L. *et al.* Synthetic Lethality-based Identification of Targets for Anticancer Drugs in  
686 the Human Signaling Network. *Sci Rep* **8**, 8440, doi:10.1038/s41598-018-26783-w  
687 (2018).
- 688 43 Cunningham, F. *et al.* Ensembl 2019. *Nucleic Acids Res* **47**, D745-D751,  
689 doi:10.1093/nar/gky1113 (2019).
- 690 44 Boyle, E. A., Pritchard, J. K. & Greenleaf, W. J. High-resolution mapping of cancer cell  
691 networks using co-functional interactions. *Molecular Systems Biology* **14**, doi:ARTN  
692 e8594  
693 10.15252/msb.20188594 (2018).
- 694 45 Raudvere, U. *et al.* g:Profiler: a web server for functional enrichment analysis and  
695 conversions of gene lists (2019 update). *Nucleic Acids Res* **47**, W191-W198,  
696 doi:10.1093/nar/gkz369 (2019).
- 697 46 Baryshnikova, A. Systematic Functional Annotation and Visualization of Biological  
698 Networks. *Cell Syst* **2**, 412-421, doi:10.1016/j.cels.2016.04.014 (2016).
- 699 47 Kryuchkova-Mostacci, N. & Robinson-Rechavi, M. A benchmark of gene expression  
700 tissue-specificity metrics. *Brief Bioinform* **18**, 205-214, doi:10.1093/bib/bbw008  
701 (2017).
- 702 48 Vivian, J. *et al.* Toil enables reproducible, open source, big biomedical data analyses.  
703 *Nat Biotechnol* **35**, 314-316, doi:10.1038/nbt.3772 (2017).
- 704 49 Mason, S. J. & Graham, N. E. Areas beneath the relative operating characteristics  
705 (ROC) and relative operating levels (ROL) curves: Statistical significance and  
706 interpretation. *Quarterly Journal of the Royal Meteorological Society* **128**, 2145-2166,  
707 doi:10.1256/003590002320603584 (2002).

## 711 **Figure Legends**

### 712 **Figure 1. Genome-wide CEBU analysis using the C-score index**

713 C-score plot: the x-axis is the dependency score of the buffered gene (G1) and the y-axis is  
714 the expression level of the buffering gene (G2). G1 is considered as being potentially  
715 buffered by G2, as quantified by C-score, which is an adjusted correlation for a given gene  
716 based on the C-score plot.

717

## 718 **Figure 2. Properties of high C-score gene pairs**

719 (A) Enrichment for duplicated genes as C-scores increase (hypergeometric test). The dashed  
720 line denotes the  $p$ -value of 0.05, where the corresponding C-score is 0.255. The red region  
721 (i.e., above the dashed line and equating to C-score > 0.255) indicates significant enrichment.  
722 The green region indicates lack of significance. (B-C) Functional enrichment of C-score gene  
723 pairs increases with C-score cutoff. (B) Enrichment of pairs of genes annotated with the same  
724 gene ontology biological process (GO:BP) term or KEGG pathway in C-score gene pairs.  
725 Enrichment increases with C-score cut-off. (C) Enrichment of pairs of genes with annotated  
726 protein-protein interactions from STRING and within the same protein complex from  
727 CORUM among C-score gene pairs. Enrichment increases with C-score cut-off. (D) Left: the  
728 buffering gene network is composed of 6,664 nodes and 42,754 edges with C-scores >  
729 0.2536. Orange nodes represent buffered genes; grey nodes are buffering genes, and blue  
730 nodes are genes that are both buffered and buffering. Right: Clusters of GO-enriched  
731 biological functions in the buffering gene network.

732

## 733 **Figure 3. Experimental validation of cell-specific expression buffering between** 734 ***FAM50A* and *FAM50B*, and *POP7* and *RPP25***

735 (A) C-score plot of the highest C-score gene pair, *FAM50A* (dependency score - D.S.) and  
736 *FAM50B* (G2) expression, labeled with the U2OS (predicted not synergistic), A549  
737 (predicted synergistic), and MCF7 (predicted synergistic) cell lines. (B) Relative cell growth

738 based on fold-change in confluency of the U2OS, A549, and MCF7 cell lines with or without  
739 *FAM50A* or *FAM50B* suppression. Bliss scores indicate strength of synergy between double  
740 suppression of *FAM50A* and *FAM50B* compared to either gene alone. Error bars indicate  
741 standard deviation of six technical repeats. (C) C-score plot of the non-duplicated gene pair,  
742 i.e., *POP7* dependency score and *RPP25* gene expression, labeled with the LN18 (predicted  
743 not synergistic), U2OS (predicted not synergistic), and HT29 (predicted synergistic) cell lines.  
744 (D) Relative cell growth based on fold-change in confluency of the HT29, U2OS and LN18  
745 cell lines with or without shRNA-based *POP7* or *RPP25* suppression. Bliss scores indicate  
746 strength of synergy between double suppression of *POP7* and *RPP25* compared to either  
747 gene alone. Error bars indicate standard deviation of six technical repeats.

748

#### 749 **Figure 4. Tissue specificity of CEBU**

750 (A) Tissue specificity ( $\tau$ ) of G1 and G2 pairs.  $\tau$  was calculated for G1 and G2 from high C-  
751 score gene pairs. Statistical significance was assessed by paired-*t* test. (B) The density plot of  
752 100,000 randomly selected high C-score gene pairs. D.S. (G1s) and expression (G2s) were  
753 normalized to be between -1 and 0 or 0 and 1, respectively. The normalized C-score plot was  
754 divided equally into nine regions (R1-R9) by radiating lines out from zero. (C) Tissue/cell-  
755 type specificity of each region (R1-R9) of the normalized C-score plot. The colored pie charts  
756 indicate the proportion of each tissue/cell type in each of the regions. The greyscale rings  
757 around the pie charts represent the relative percentage of statistically enriched gene pairs for  
758 the corresponding tissue/cell types. The tissue/cell types with high percentages of enriched  
759 gene pairs (dark grey or black) are annotated for each region.

760

#### 761 **Figure 5. C-score-derived tissue-specific buffering capacity**

762 (A) Illustration showing how cell-specific buffering capacities were derived from C-scores.  
763 Buffering capacity was calculated based on: 1) the regression line of the C-score for the gene  
764 pair; and 2) relative G2 expression (compared to that of all other cell lines) for the cell line of  
765 interest. See **Methods** for the formula for buffering capacity calculation. (B) Predictive  
766 performance shown as ROC curves for predicting genetic interactions using cell-specific  
767 buffering capacity. Prediction sets consist of 84 data-points (37 unique genetically interacting  
768 gene pairs) across 8 cell lines with a C-score cut-off of 0.25. (C) Mean buffering capacity for  
769 each tissue type (lower panel) and the corresponding proportion of enriched gene pairs for  
770 each region (upper panel).

771

## 772 **Figure 6. Harnessing cell-specific high C-score gene pairs for cancer patient prognosis**

773 (A) C-score plot of *NAMPT* dependency score and *CALDI* gene expression (C-score = 0.447).  
774 Yellow circles represent central nervous system (CNS) cell lines and blue circles denote  
775 leukemia cell lines. (B) Kaplan-Meier overall survival plots for CNS (LGG, lower grade  
776 glioma, left panel) and leukemia (LAML, acute myeloid leukemia, right panel) cancer  
777 patients. Patients were stratified by high (>75%) or low (<25%) expression of *CALDI*, and *p*-  
778 values were calculated using Cox regression controlling for age, sex, pathological staging,  
779 clinical staging, and tumor grade, and corrected for multiple testing (false discovery rate <  
780 0.2). (C) AUC of ROC curves based on C-score gene pair-based prediction of survival for  
781 each cancer type with different C-score cutoffs. Only the cancer types with at least one  
782 significantly positive C-score cutoff and those containing more than 1% of genes predicting  
783 patient survival with statistical significance are shown (\* denotes  $p < 0.05$ ).

784

## 785 **Supporting Information Captions**

786 **Figure S1. Distribution of C-scores**

787 **Figure S2. Correlation properties of G1 dependency score and G2 gene expression**

788 **according to increasing C-score**

789 **Figure S3. Functional and pathway enrichments of C-score-identified duplicated genes**

790 **Figure S4. Shuffling the G2-tissue relationship disrupts G2 tissue-specificity**

791 **Figure S5. C-score-based prediction of cell-specific genetic interaction using buffering**

792 **capacity**

793 **Figure S6. C-score-based prediction of cancer pathological stage, clinical stage and**

794 **tumor grade**

795 **Figure S7. Decreasing effects of mutational variation as C-score increases**

796 **Table S1. List of combinatorial CRISPR-screened gene pairs in published literature**

797 **Table S2. Cross-reference table for TCGA cancer type and DepMap cancer type**





Figure 2

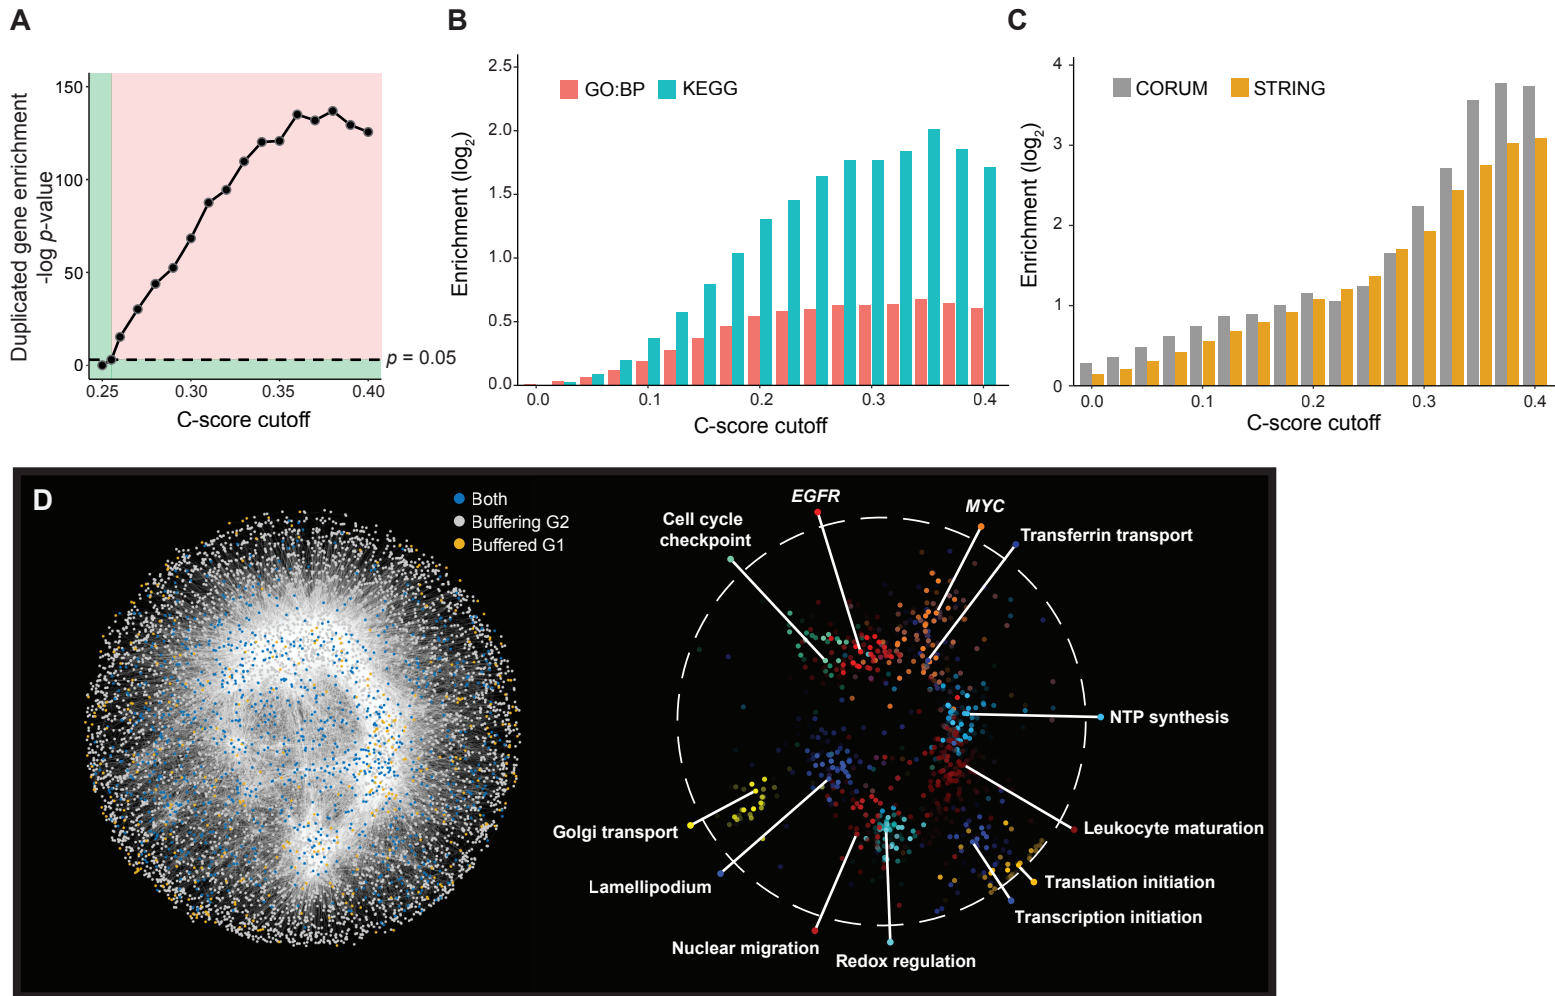

**Figure 3****A**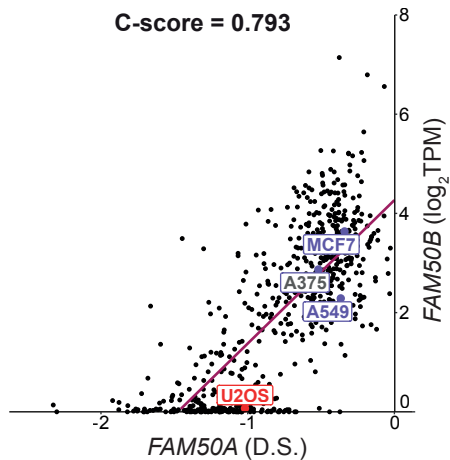**B**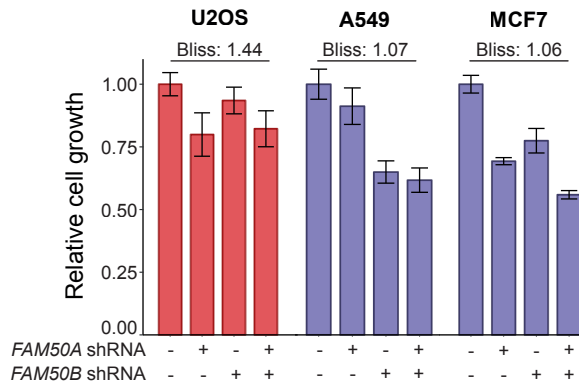**C**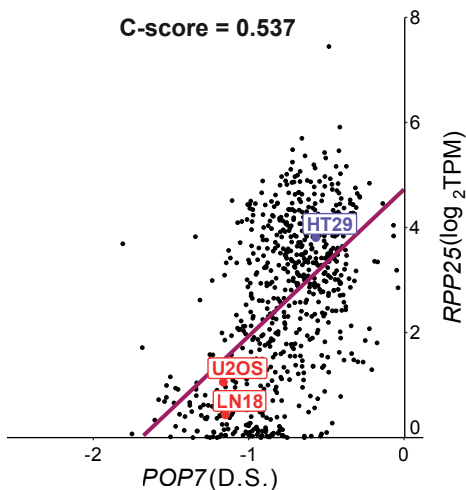**D**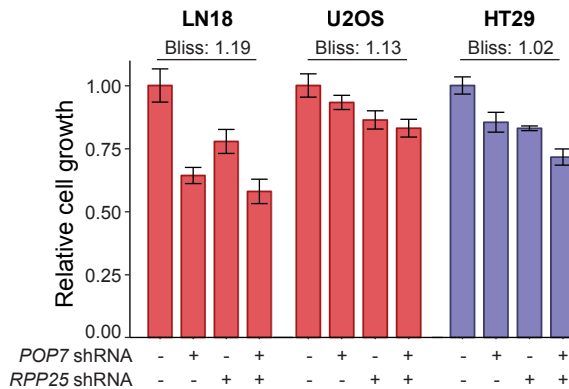

**Figure 4**

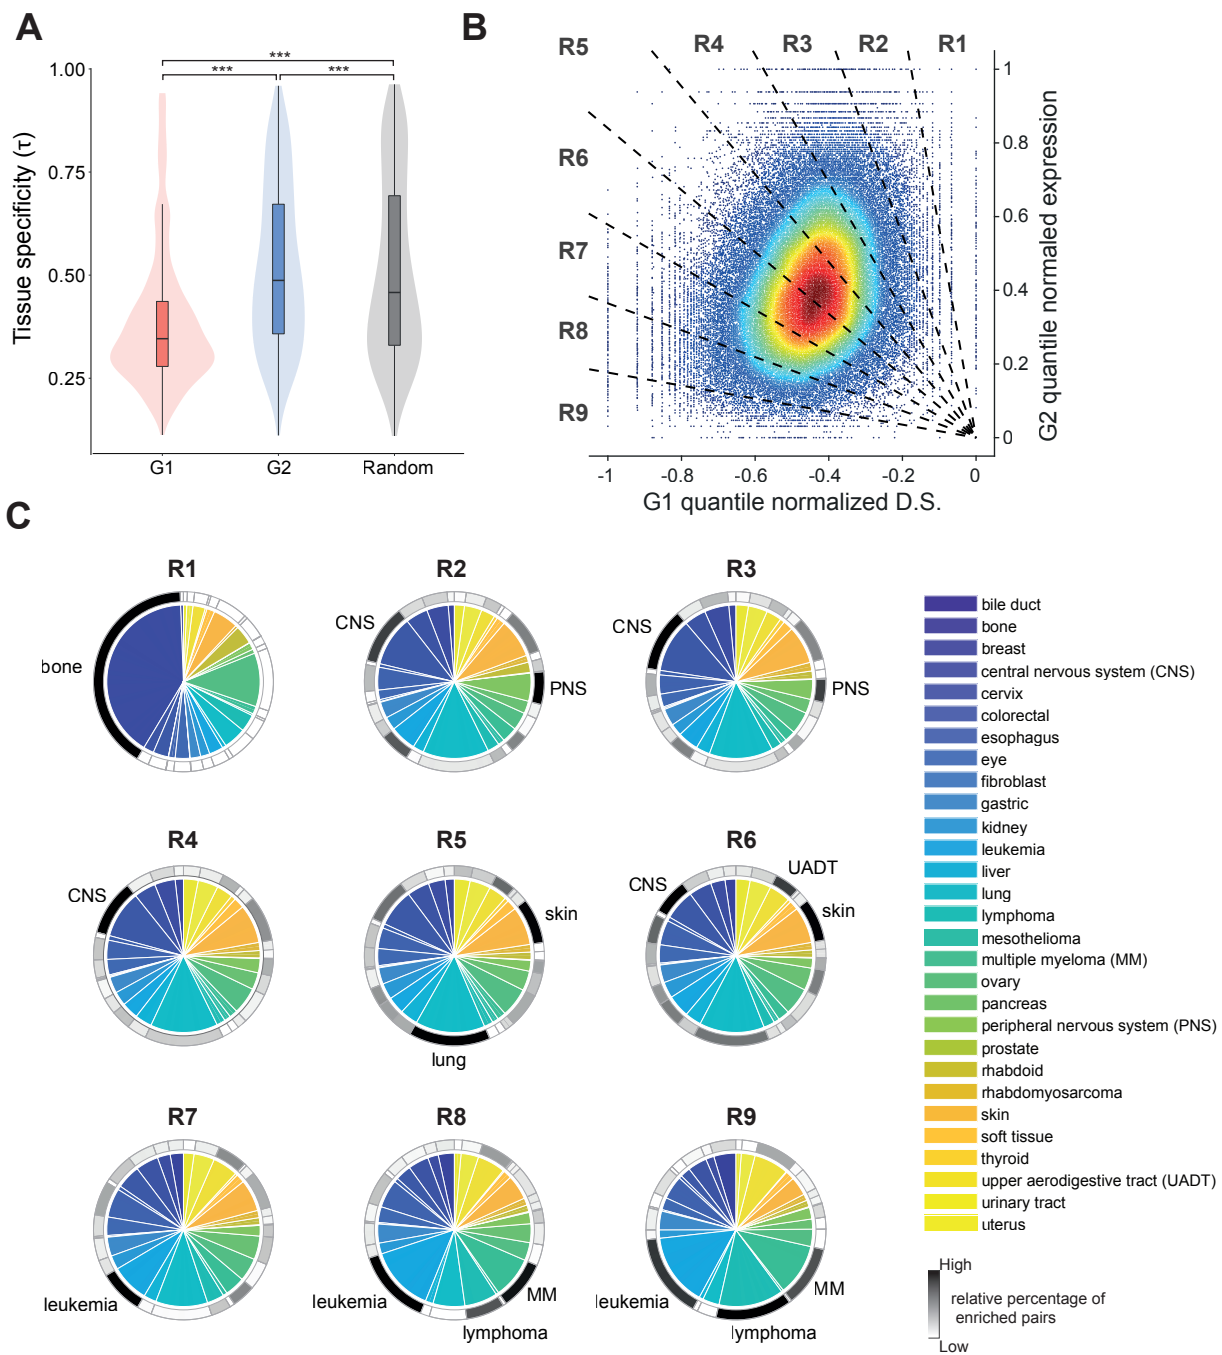

# Figure 5

**A**

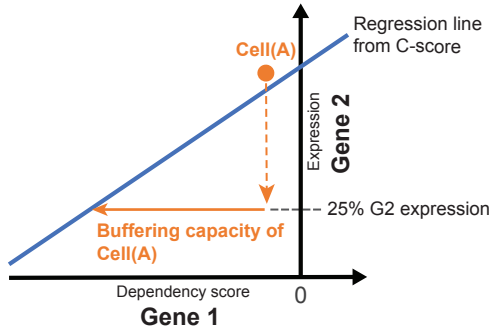

**B**

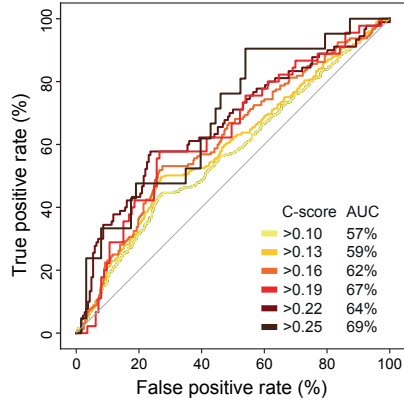

**C**

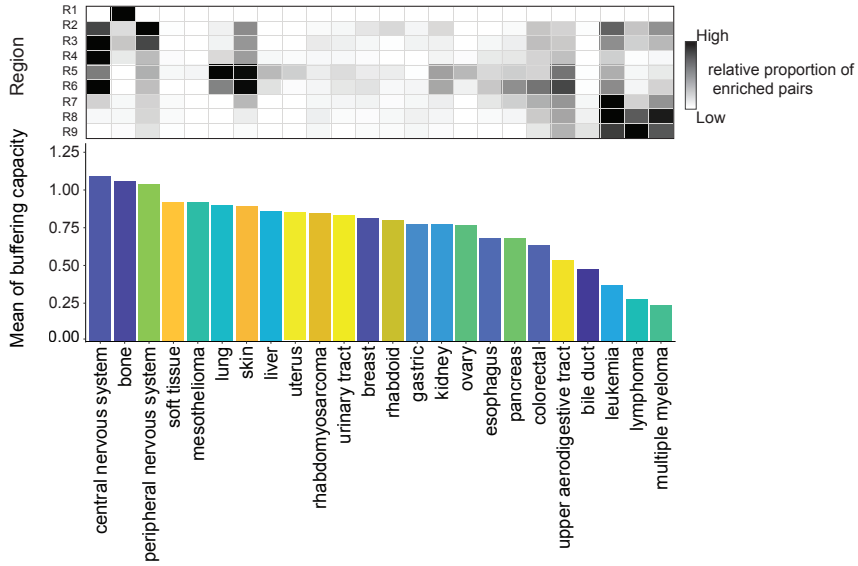

**Figure 6****A**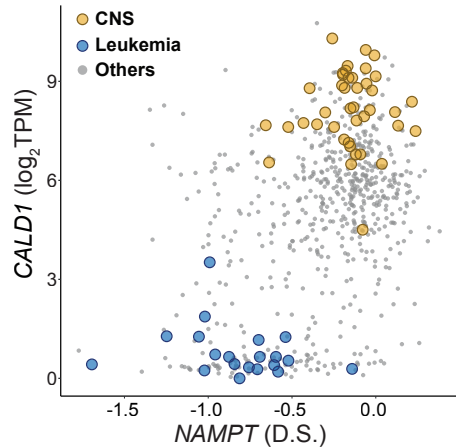**B**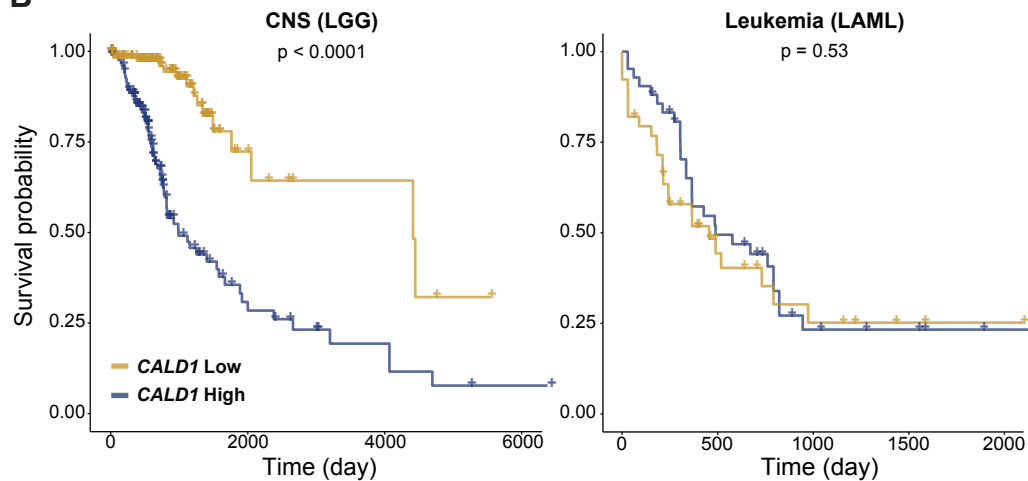**C**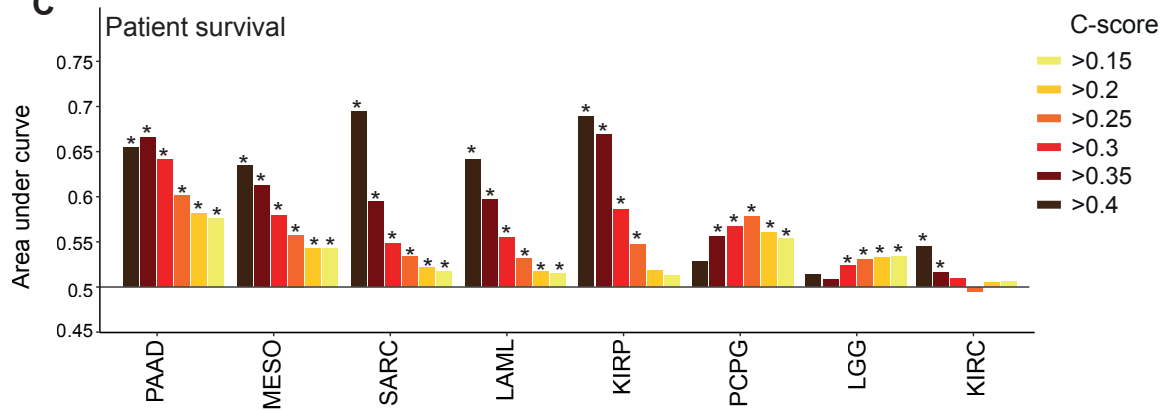

Source: https://www.biorxiv.org/content/biorxiv/early/2021/08/18/2021.07.26.453775.full.pdf
